# Supplementary material for: MoO2–ordered mesoporous carbon hybrids as anode materials with highly improved rate capability and reversible capacity for lithium-ion battery
Source: Royal Society of Chemistry journal article supplement (doi:10.1039/c3cp51255j), 2013-01-01
Supplement: c3cp51255j.pdf [file c3cp51255j.pdf]

## Supporting Information

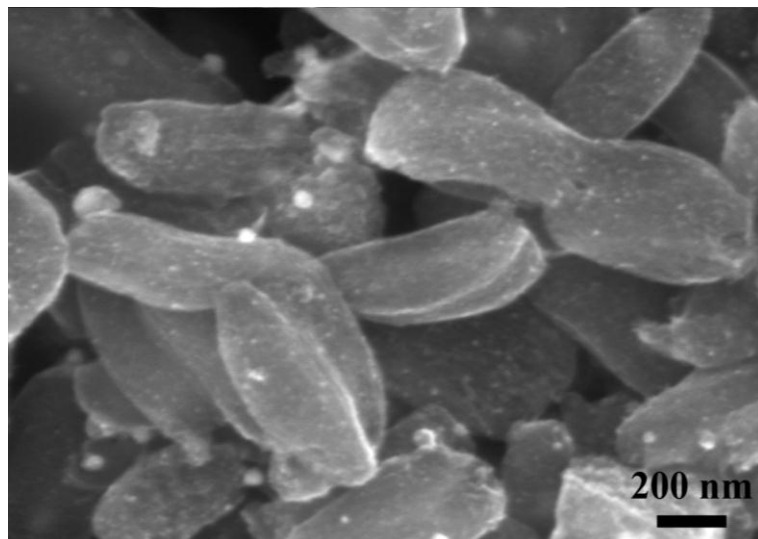

Figure S1. A SEM image of MoO<sub>2</sub>/OMC hybrid.

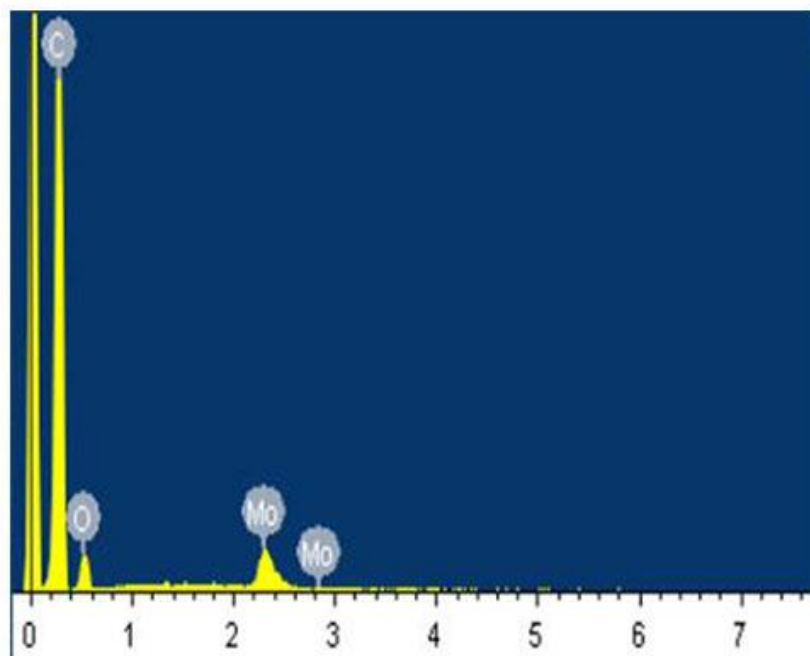

Figure S2. EDS spectrum of the MoO<sub>2</sub>/OMC hybrids.

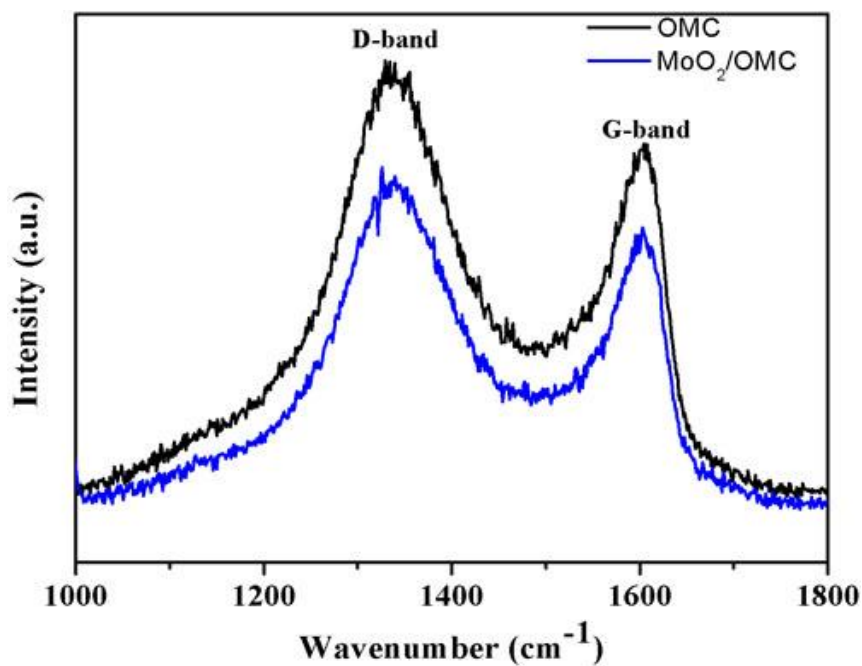

Figure S3. Raman spectra of OMC and MoO<sub>2</sub>/OMC hybrids.

The Raman spectrum (Figure S3) displays both D-band and G-band in both OMC and the hybrids, which indicates the existence of carbon in the hybrids.

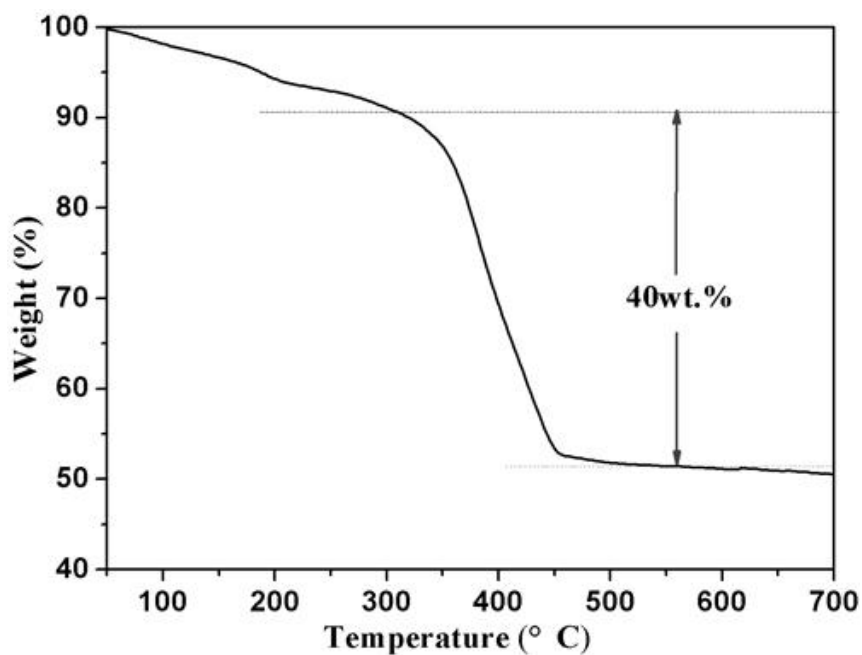

Figure S4. TGA curve of the MoO<sub>2</sub>/OMC hybrids under air atmosphere at a rate of 10 °C min<sup>-1</sup> from 40 °C to 700 °C.

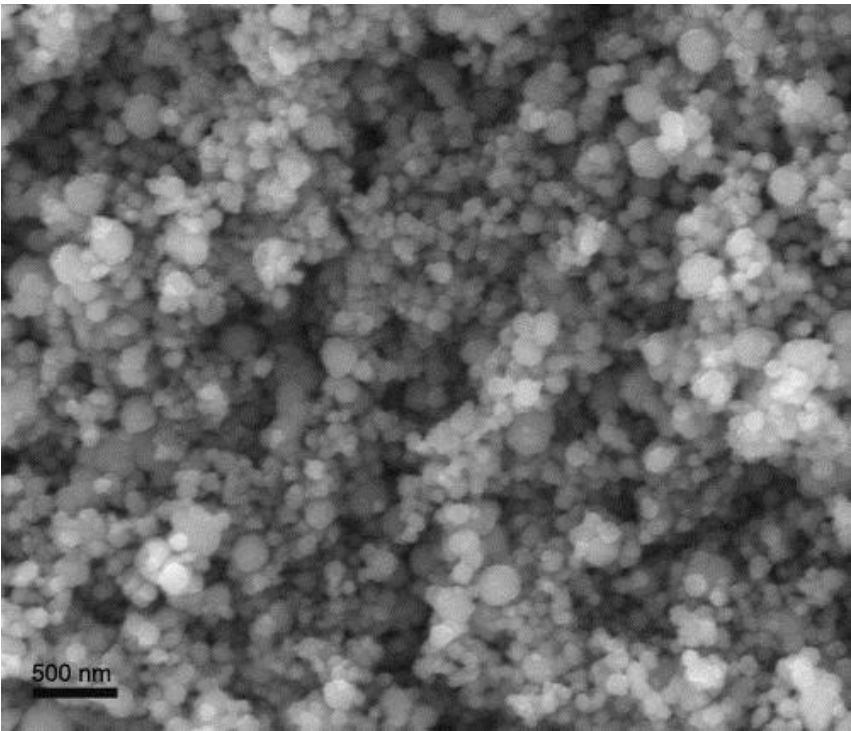

Figure S5. SEM image of pure MoO<sub>2</sub> nanoparticles.

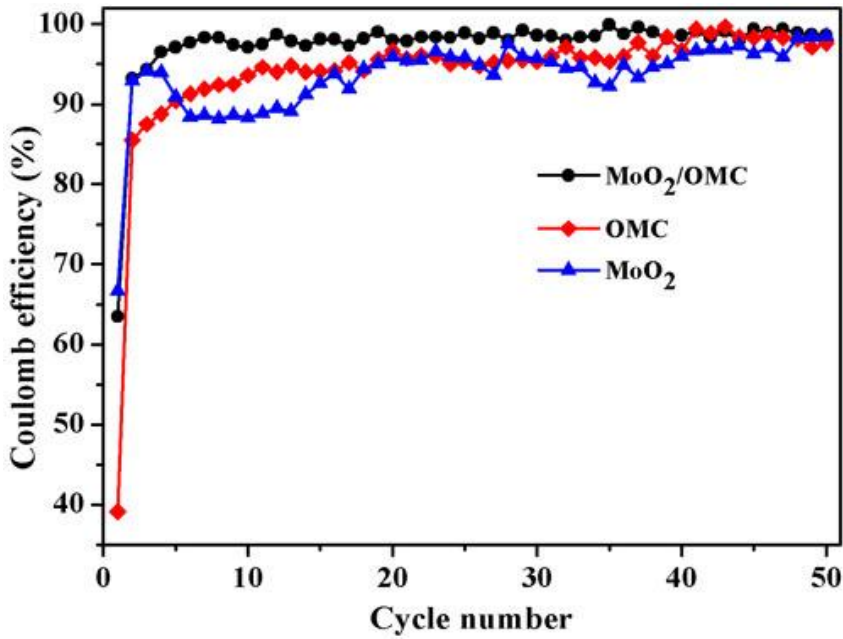

Figure S6. Coulombic efficiency of OMC, pure MoO<sub>2</sub>, and MoO<sub>2</sub>/OMC electrodes at a current of 100 mA g<sup>-1</sup>.

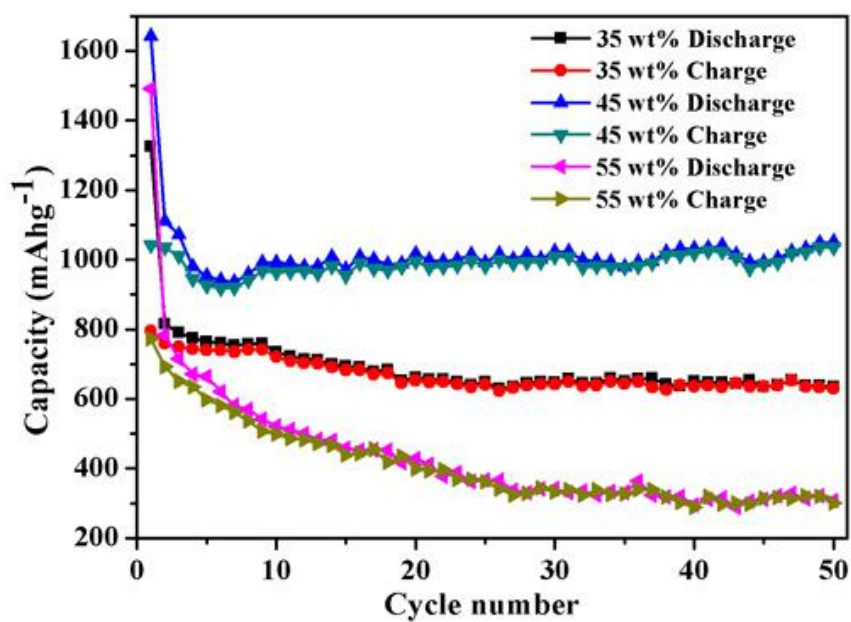

Figure S7. Cycling performance of MoO<sub>2</sub>/OMC hybrids with different MoO<sub>2</sub> contents at a current density of 100 mA g<sup>-1</sup>.

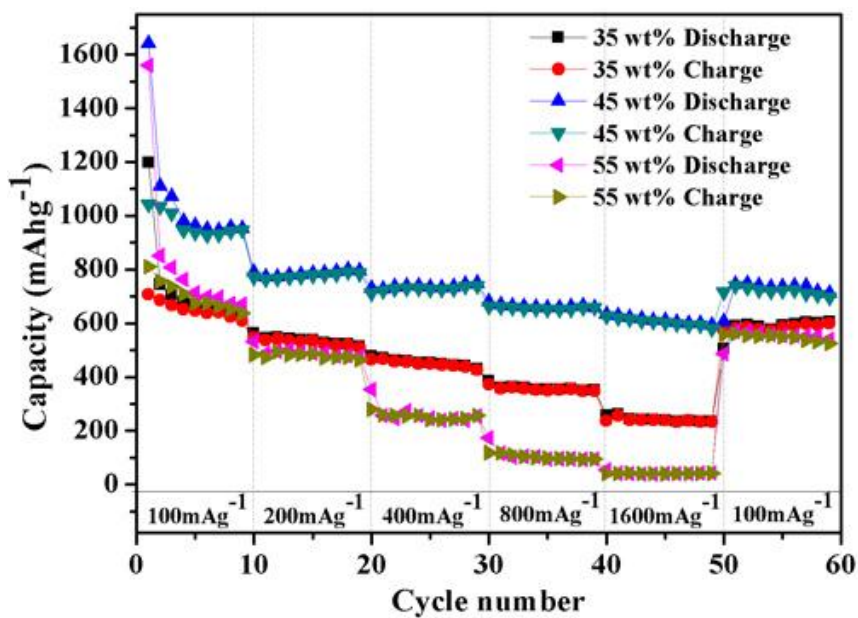

Figure S8. Rate performance with increasing current density from 100 to 1600 mA g<sup>-1</sup> of MoO<sub>2</sub>/OMC hybrids with different MoO<sub>2</sub> contents.
